# Supplementary material for: VGF and the VGF-derived peptide AQEE30 stimulate osteoblastic bone formation through the C3a receptor
Source: Springer Nature journal article supplement (doi:10.1038/s12276-025-01419-y), 2025-03-13
Supplement: MOESM1 [file 12276_2025_1419_MOESM1_ESM.pdf]

# **Supplementary Information**

**VGF and the VGF-derived peptide AQEE30 stimulate osteoblastic bone formation through the C3a receptor**

**Sung-Ah Moon, Jin-Man Kim, Young-Sun Lee, Han Jin Cho, Young Jin Choi, Jong Hyuk Yoon, Dayea Kim, Xiangguo Che, Xian Jin, In-Jeoung Baek, Seung Hun Lee, Je-Young Choi, and Jung-Min Koh**

## **Supplementary Materials and Methods**

### **Collection of Wnt3a CM**

L929 cells stably overexpressing Wnt3a were cultured in DMEM supplemented with 10% FBS. After the cells reached 90% confluence, the medium was replaced with DMEM containing 2% FBS, and the cells were further incubated for 2 days. The supernatants were collected, filtered through a 0.45- $\mu$ m filter, and stored at  $-80^{\circ}\text{C}$  until further use.

### **Reporter gene assay**

MC3T3-E1 cells ( $2 \times 10^5$  cells) were transfected with 100 ng superTOP-Flash, a Wnt signalling reporter, in 24-well plates using a Lipofectamine 2000 transfection reagent (Invitrogen), and treated with Wnt3a CM (1/10 dilution) in the presence or absence of 5  $\mu\text{M}$  AQEE30 for 48 h. For the Runx2 reporter, the cells ( $2 \times 10^5$  cells) were transfected with 6 $\times$ OSE2-luc Runx2 reporter constructs (100 ng), and treated with 1  $\mu\text{M}$  and 5  $\mu\text{M}$  AQEE30 for 48 h. Cell lysates were lysed in reporter lysis buffer and assayed with a Dual Luciferase kit (Promega, Madison, WI, USA). Luciferase activity was measured using a Luminometer (Centro LB 960; Berthold Technologies, Bad Wildbad, Germany).

### **VGF-derived peptides and antibodies**

The VGF-derived peptides used in this study include NERP1 (#076-89), NERP2 (#076-91), AQEE19 (#007-73), AQEE30 (#007-70), TLQP21 (#003-90), and TLQP62 (#007-82) from Phoenix Pharmaceuticals (Burlingame, CA, USA). Mouse AQEE30 and H2N-8-amino-3,6-dioxaoctanoic acid (mini-PEG<sub>2</sub>)-conjugated AQEE30 (PEG<sub>2</sub>-AQEE30) were synthesized from Peptron Inc. (Daejeon, Korea). We used the following antibodies; Periostin (19899-1-AP) antibody from Proteintech (Rosemont, IL, USA); alkaline phosphatase (ALP, NBP3-15273) antibody from Novus Biologicals (Centennial, CO, USA); VGF (ab69989) antibody from Abcam (Cambridge, UK); p21 (sc-6246) antibody from SantaCruz Biotechnology (Dallas, TX, USA); His (12698), pRb (9308), and Rb (9309)

antibodies from Cell signaling (MA, USA);  $\alpha$ -tubulin (T9026) and actin (A3854) antibodies from Sigma-Aldrich; osteocalcin (M173) antibody from Takara (Tokyo, Japan); and C3AR1 (orb101135) antibody from Biorbyt (Cambridge, UK).

### **Isolation of mouse periosteal skeletal stem cells (PSSC) and bone marrow skeletal stem cells (BMSC)**

After careful removal of the muscles, femurs and tibias were incubated with PBS containing 1% FBS on ice for 30 min to loosen the periosteum from the underlying bone surface. Periosteum was detached from the bones using scalpel and forceps and placed on a cell strainer. The collected periosteal tissues washed with cold PBS and incubated with PBS containing collagenase (1 mg/ml, Gibco) and dispase (2 mg/ml, Sigma-Aldrich) at 37°C for 60 min. The dissociated cells were washed with PBS, filtered through a 40- $\mu$ m nylon strainer, and resuspended in MEM $\alpha$  containing 10% FBS. For isolation of BMSC, BM cells were collected from the dissected femurs and tibias using a syringe with a 26-gauge needle. The BM cells were incubated with collagenase (1 mg/ml) and dispase (2 mg/ml) in PBS at 37°C for 60 min. The dissociated BM cells were washed with PBS, filtered using a 40- $\mu$ m strainer. The cells were resuspended in MEM $\alpha$  with 10% FBS.

### **Colony forming unit assay**

PSSC (35 ~ 40 cells/well) were seeded on a 6-well plates in MEM $\alpha$  medium with 20% FBS. After 24 h, the medium was treated with  $Vgf^{+/+}$  and  $Vgf^{-/-}$  MK-CM and cultured for 14 days. The cells were washed, fixed with 4% paraformaldehyde, and stained with 1% crystal violet staining solution according to the manufacturer's protocol.

### **Chondrogenic differentiation assay**

PSSC ( $2 \times 10^5$ ) were plated in a 12-well plate for 2 days. The cells were cultured with MK-CM from

*Vgf<sup>+/+</sup>* and *Vgf<sup>-/-</sup>* mice in the presence of chondrogenic differentiation reagent (Gibco). The medium was changed every 2-3 days for 21 days and the cells were stained with Alcian blue solution (Sigma-Aldrich) according to the manufacturer's protocol. The stained Alcian blue dye was dissolved with 6M Guanidine-HCl solution (Sigma-Aldrich) and measured using a microplate reader at absorbance 620 nm.

### **ALP immunohistochemistry and osteocyte counting**

Femurs were fixed in 4% paraformaldehyde, decalcified, and sectioned with a cryostat. The 5- $\mu$ m-thick paraffin-embedded bone sections were deparaffinized, rehydrated, and subjected to heat-mediated antigen retrieval in citrate buffer at pH 6.0. The slides were incubated with an anti-ALP antibody (1/100 dilution; Novus Biologicals) at 4°C overnight. The slides were incubated with the Dako Envision+ System-horseradish peroxidase-labeled polymer secondary antibody system (Dako K4003) for 60 min at room temperature. The slides were stained with the Dako Liquid DAB+ substrate chromogen system (Dako K3467) according to the manufacturer's instructions, and were counter-stained with hematoxylin. Images were photographed using an Olympus BX53 microscope (Olympus Corporation). For counting of osteocytes, the bone section slides were stained with H&E. The slides were photographed and measured with IMT i-Solution Lite software (version 26.1; IMT i-Solution Inc., BC, Canada). Osteocytes were classified histologically into alive, dying, and dead cells as described a previous study.<sup>1</sup> Alive cells were characterized by a whole nucleus with almost no empty space in the lacuna. Dying cells were identified as cells with a fragmented nucleus in the lacuna. Dead cells were identified as having no cell and nucleus in the lacuna. Quantitative analysis was calculated by dividing the number of counted cells/lacunae by the area of cortical bone or total number of cells/lacunae.

### **Supplementary Reference**

1. McKenzie J, Smith C, Karuppaiah K, Langberg J, Silva MJ, Ornitz DM. Osteocyte Death and

Bone Overgrowth in Mice Lacking Fibroblast Growth Factor Receptors 1 and 2 in Mature Osteoblasts and Osteocytes. *J Bone Miner Res* 2019; **34**: 1660-1675.

**Supplementary Table 1. Sequences of siRNAs.**

| Primers                    | Forward (5'-3')       |
|----------------------------|-----------------------|
| Human <i>VGF</i>           | CGGCGGCAGCAGAGACGGAAA |
| Scrambled ( <i>VGF</i> )   | GCGAACGGCGACGGAGGACAA |
| Mouse <i>C3AR1</i>         | CAGCGGGTTTCCTGTTGAAGA |
| Scrambled ( <i>C3AR1</i> ) | GTTGTTAGCGTGGACATCCAG |

**Supplementary Table 2. Primer sequences for qRT-PCR.**

| Primers            | Forward (5'-3')            | Reverse (5'-3')         |
|--------------------|----------------------------|-------------------------|
| Human <i>VGF</i>   | AGCCTCCTCCTCTCAGCTCT       | GAAAAGCTCTCCCTCGTCCT    |
| Human <i>HMGB1</i> | GCGAAGAACTGGGAGAGATGT<br>G | GCATCAGGCTTTCCTTTAGCTCG |
| Human <i>HDGF</i>  | AGAGGCTACCAAGGAAGATGC      | GGCTCCTCTTGAAACATTGG    |
| Human <i>I8S</i>   | GTAACCCGTTGAACCCCAT        | CCATCCAATCGGTAGTAGCG    |
| Mouse <i>Vgf</i>   | ATACTCCAGCCACGGAACAG       | GGCAACGTGAAGGTTTTCAT    |
| Mouse <i>C3ar1</i> | TGACAGGTCAGCTCCTTCCT       | CATTAGGAGGCTTCCACCA     |
| Mouse <i>gC1qR</i> | GGCCTTCGTTGAATTCTTGA       | TCCGCAAGGAAATCCATTAG    |
| Mouse <i>I8S</i>   | CTCAACACGGGAAACCTCAC       | CGCTCCACCAACTAAGAACG    |

**Supplementary Table 3. Proteins commonly identified in two fractions of conditioned media collected from differentiated megakaryocyte-like cells.**

| Accession Number | Symbol   | Score | Molecular weight (kDa) | Fraction #51 |                  | Fraction #51 |                  |
|------------------|----------|-------|------------------------|--------------|------------------|--------------|------------------|
|                  |          |       |                        | Coverage     | Matched peptides | Coverage     | Matched peptides |
| O15240           | VGF      | 37.9  | 67.2                   | 11.7         | 8                | 9.1          | 6                |
| P09429           | HMGB1    | 24.2  | 24.9                   | 7.9          | 6                | 9.3          | 3                |
| P51858           | HDGF     | 10.5  | 26.8                   | 18.8         | 3                | 7.1          | 1                |
| P07737           | PFN1     | 2.5   | 15.0                   | 10.0         | 1                | 11.4         | 2                |
| P35637           | FUS      | 16.7  | 53.4                   | 6.3          | 4                | 12.4         | 4                |
| P42167           | LAP2     | 13.0  | 50.6                   | 5.5          | 4                | 5.7          | 1                |
| P62888           | RPL30    | 6.0   | 12.8                   | 7.0          | 1                | 7.0          | 1                |
| Q13185           | CBX3     | 6.8   | 20.8                   | 7.7          | 2                | 7.7          | 1                |
| Q6ZSJ8           | C1orf122 | 2.9   | 11.5                   | 10.0         | 1                | 10.0         | 1                |
| Q96KK5           | H2AC12   | 5.4   | 13.9                   | 14.8         | 1                | 37.5         | 3                |
| Q9Y237           | PIN4     | 17.3  | 13.8                   | 10.7         | 4                | 10.7         | 1                |
| Q9Y2V2           | CARH2P1  | 5.9   | 15.9                   | 18.4         | 2                | 10.9         | 1                |

The three proteins in the grey background may be secreted extracellularly.

**Supplementary Table 4. Identification of VGF in conditioned media collected from differentiated megakaryocyte-like cells.**

|     |             |             |            |            |            |
|-----|-------------|-------------|------------|------------|------------|
| 1   | MKALRLSASA  | LFCLLLINGL  | GAAPPGRPEA | QPPPLSSEHK | EPVAGDAVPG |
| 51  | PKDGSAPFVR  | GARNSEPDQE  | GELFQGVDPK | ALAAVLLQAL | DRPASPPAPS |
| 101 | GSQQGPDEEA  | AEALLTETVR  | SQTHSLPAPE | SPEPAAPPRP | QTPENGPEAS |
| 151 | DPSEEELEALA | SLLQELRDFS  | PSSAKRQKET | AAAETETRTH | TLTRVNLESP |
| 201 | GPERVWRASW  | GEFQARVPER  | APLPPAPSPQ | FQARMPDSGP | LPETHKFGEG |
| 251 | VSSPKTHLGE  | ALAPLSKAYQ  | GVAAPFPKAR | RPESALLGGS | EAGERLLQQG |
| 301 | LAQVEAGRRQ  | AEATRQAAAQ  | EERLADLASD | LLLQYLLQGG | ARQRGLGGRG |
| 351 | LQEAAEERES  | AREEEEEAEQE | RRGGEERVGE | EDEEAAEAEA | EAEAAERARQ |
| 401 | NALLFAEEED  | GEAGAEDKRS  | QEETPGHRRK | EAEGTEEGGE | EEDDEEMDPQ |
| 451 | TIDSLIELST  | KLHLPADDVV  | SHIEVEEKR  | KRKKNAPPEP | VPPRAAPAP  |
| 501 | THVRSPQPPP  | PAPAPARDEL  | PDWNEVLPPW | DREEDEVYPP | GPYHPFPNYI |
| 551 | RPRTLQPPSA  | LRRRHYYHAL  | PPSRHYPGRE | AQARRAQEEA | EAEERLQEQ  |
| 601 | EELNYIEHV   | LLRRP       |            |            |            |

Among the sequences of the VGF protein, those of the peptides identified by LC-MS/MS are highlighted in red-colored text.

## Supplementary Figure 1

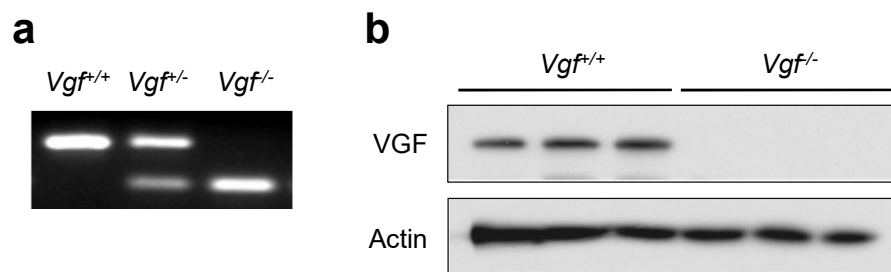

**Supplementary Fig. 1. Genotyping and VGF expression in male *Vgf*<sup>-/-</sup> mice.** **a** Genotyping PCR analysis of *Vgf*<sup>+/+</sup>, *Vgf*<sup>+/-</sup>, and *Vgf*<sup>-/-</sup> alleles. The bands corresponding to the *Vgf*<sup>+/+</sup> and *Vgf*<sup>-/-</sup> allele are 125 bp and 64 bp, respectively. **b** Total proteins were extracted from calvaria bone of male *Vgf*<sup>+/+</sup> and *Vgf*<sup>-/-</sup> mice, and western blot for VGF was performed.



## Supplementary Figure 2

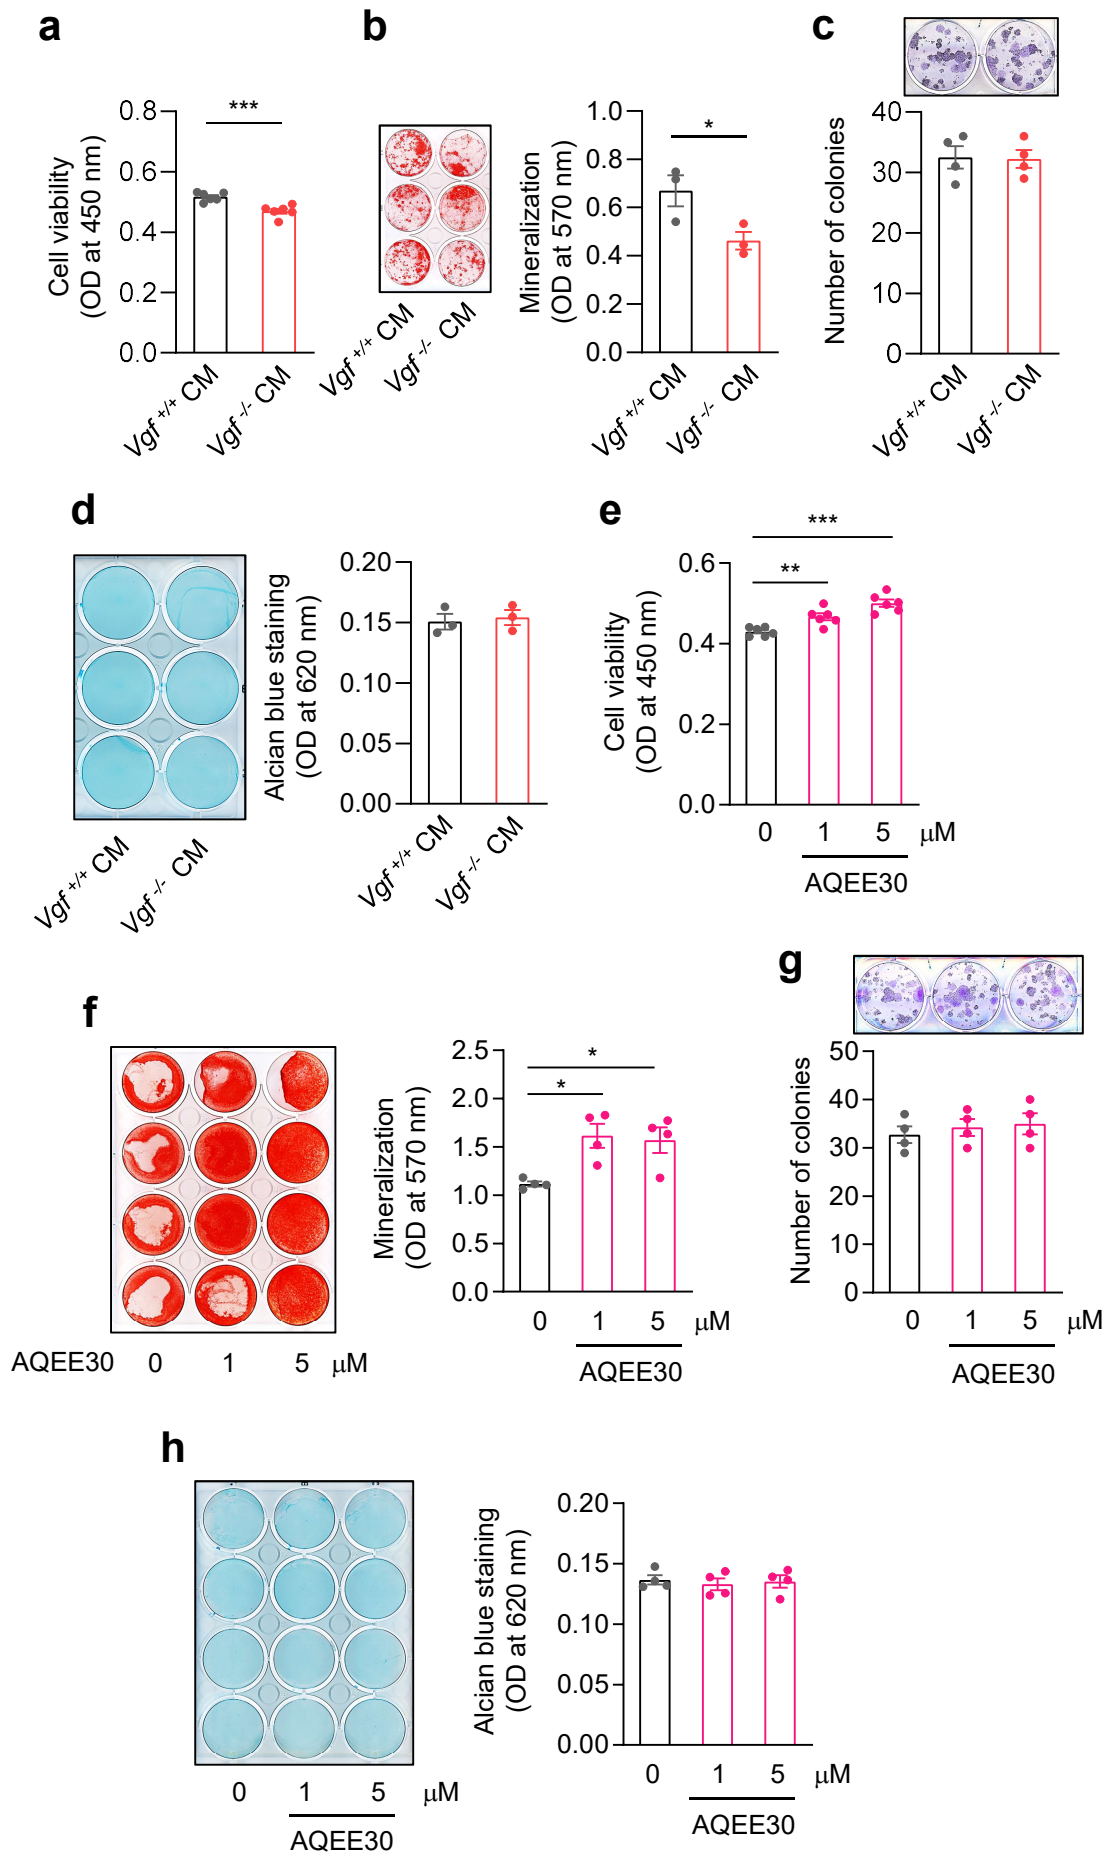

**Supplementary Fig. 2. Effects of MK CM and AQEE30 on periosteal skeletal stem cells.** **a, b** Murine fetal liver cells isolated from *Vgf*<sup>-/-</sup> mice and their wild-type littermates were differentiated into mature megakaryocytes (MK) by thrombopoietin treatment. Cell viability (**a**,  $n = 6$ ) and mineralization capacity (**b**,  $n = 3$ ) of periosteal skeletal stem cells (PSSC) after the treatment with conditioned media (CM) of mature MK were measured. Mineralization were stained with Alizarin red S (left), and measured at 570 nm (right). **c** PSSC were treated with mature MK CM and the number of colony formation was counted after 14 days. Colonies consisting of more than 50 cells were counted (lower,  $n = 4$ ). **d** Chondrogenic differentiation assay was determined by Alcian blue staining (left) and measured at 620 nm (right) ( $n = 3$ ). **e** PSSC were treated with AQEE30 for 48 h, and cell viability was determined ( $n = 6$ ). **f** Bone nodule formation assays in PSSC was carried out as in (**b**) after treatment with the indicated doses of AQEE30 ( $n = 4$ ). **g** PSSC were treated with AQEE30 and the number of colony formation was counted after 14 days ( $n = 4$ ). **h** Chondrogenic differentiation assay was determined by Alcian blue staining (left) and measured at 620 nm (right) ( $n = 4$ ). Data represent mean  $\pm$  SEM.  $*p < 0.05$ ,  $**p < 0.01$ , and  $***p < 0.001$  vs. control groups.

## Supplementary Figure 3

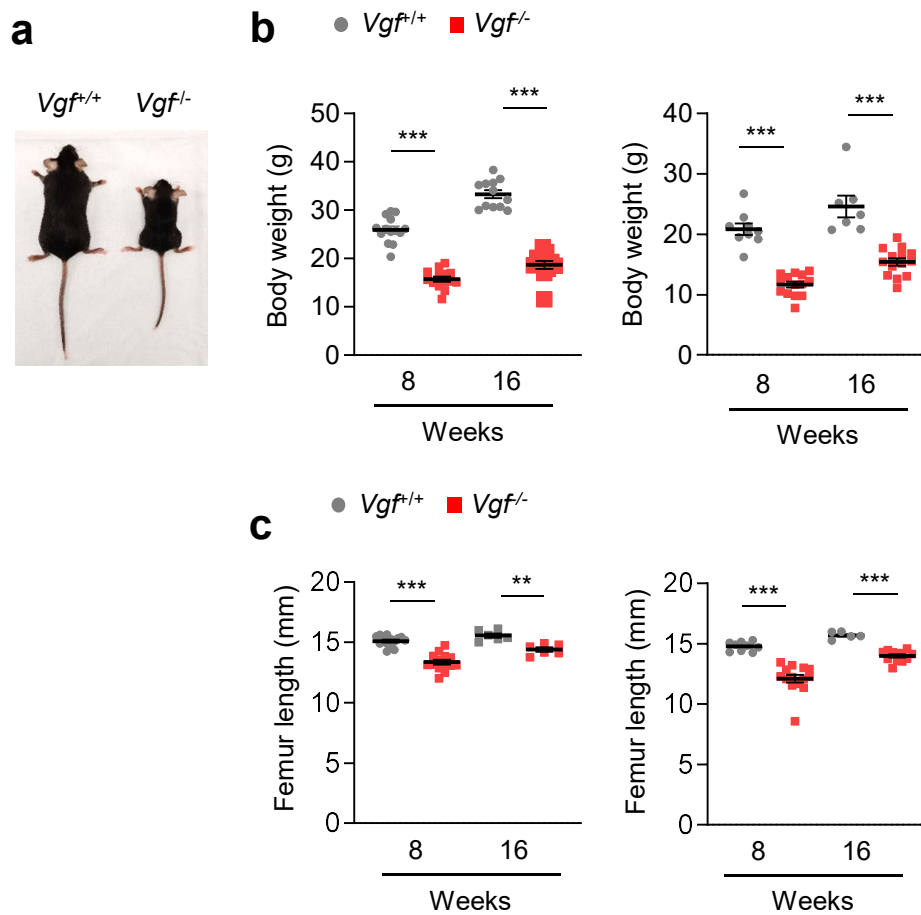

**Supplementary Fig. 3. Postnatal growth in both male and female *Vgf*<sup>-/-</sup> mice.** **a–c** Gross appearance (**a**), body weight (**b**), and femur length (**c**) of male (left) and female (right) *Vgf*<sup>-/-</sup> mice and their wild-type littermates at 8 and 16 weeks of age. Data represent mean ± SEM (**b**, 14 *Vgf*<sup>+/+</sup> and 14 *Vgf*<sup>-/-</sup> mice in 8-week-old male, 12 *Vgf*<sup>+/+</sup> and 11 *Vgf*<sup>-/-</sup> mice in 16-week-old male, 9 *Vgf*<sup>+/+</sup> and 16 *Vgf*<sup>-/-</sup> mice in 8-week-old female, and 7 *Vgf*<sup>+/+</sup> and 14 *Vgf*<sup>-/-</sup> mice in 8-week-old female; **c**, 14 *Vgf*<sup>+/+</sup> and 14 *Vgf*<sup>-/-</sup> mice in 8-week-old male, 6 *Vgf*<sup>+/+</sup> and 6 *Vgf*<sup>-/-</sup> mice in 16-week-old male, 9 *Vgf*<sup>+/+</sup> and 16 *Vgf*<sup>-/-</sup> mice in 8-week-old female, and 5 *Vgf*<sup>+/+</sup> and 12 *Vgf*<sup>-/-</sup> mice in 16-week-old female). \*\**p* < 0.01 and \*\*\**p* < 0.001 between the groups.

## Supplementary Figure 4

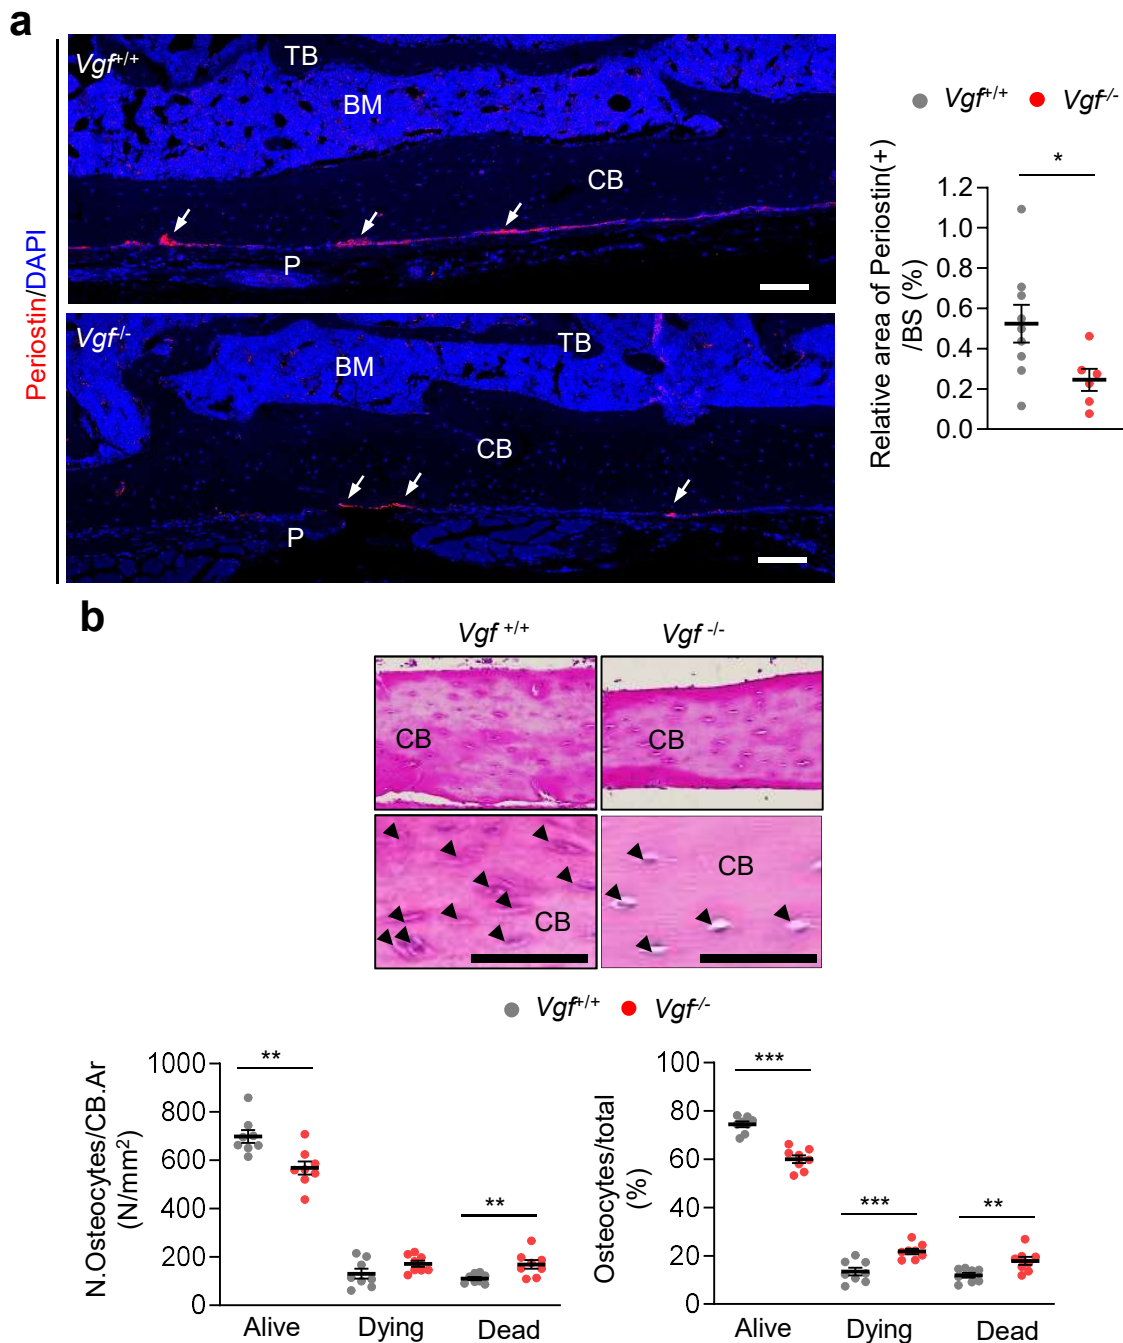

**Supplementary Fig. 4. Decreased periostin expression and osteocyte numbers in the cortical bones of *Vgf*<sup>-/-</sup> mice.** **a** Periostin areas (white arrows) of 16-week-old male *Vgf*<sup>-/-</sup> mice ( $n = 6$ ) and their wild-type littermates ( $n = 9$ ). Representative images are shown on the left, and their quantitative result is shown on the right. Scale bar, 100  $\mu$ m. White arrows indicate periostin-positive areas. **b** Representative hematoxylin and eosin staining images of femurs of 16-week-old male *Vgf*<sup>-/-</sup> mice ( $n = 8$ ) and their *Vgf*<sup>+/+</sup> littermates ( $n = 8$ ) are shown on the upper. Osteocyte number (N.Osteocytes) per cortical bone areas (CB.Ar) (left/bottom) and total osteocytes (right/bottom) are shown. Scale bar, 50  $\mu$ m. Arrow heads indicate the osteocytes. BM, bone marrow; BS, bone surface; CB, cortical bone; TB, trabecular bone; and P, periosteum. Data represent mean  $\pm$  SEM. \* $p < 0.05$ , \*\* $p < 0.01$ , and \*\*\* $p < 0.001$  between the groups.

## Supplementary Figure 5

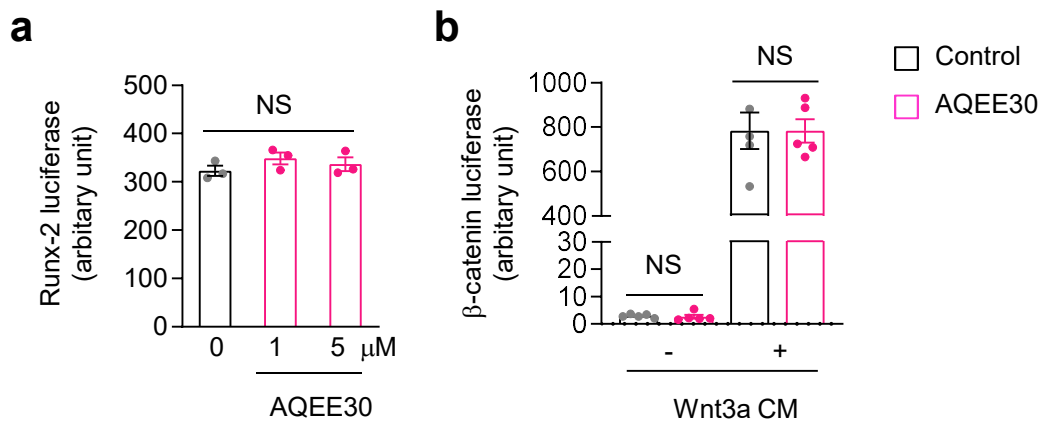

**Supplementary Fig. 5. Effects of AQEE30 on Runx2 and β-catenin activities.** **a** MC3T3-E1 cells were treated with 1 μM and 5 μM AQEE30 for 48 h, and Runx2 transcriptional activity was measured using a Runx2 luciferase assay. Data represent mean ± SEM ( $n = 3$ ). **b** MC3T3-E1 cells were treated with 5 μM AQEE30 in the presence or absence of Wnt3a CM for 48 h, and the β-catenin luciferase assay was performed. Data represent mean ± SEM ( $n = 5$ ). NS, not significant.

## Supplementary Figure 6

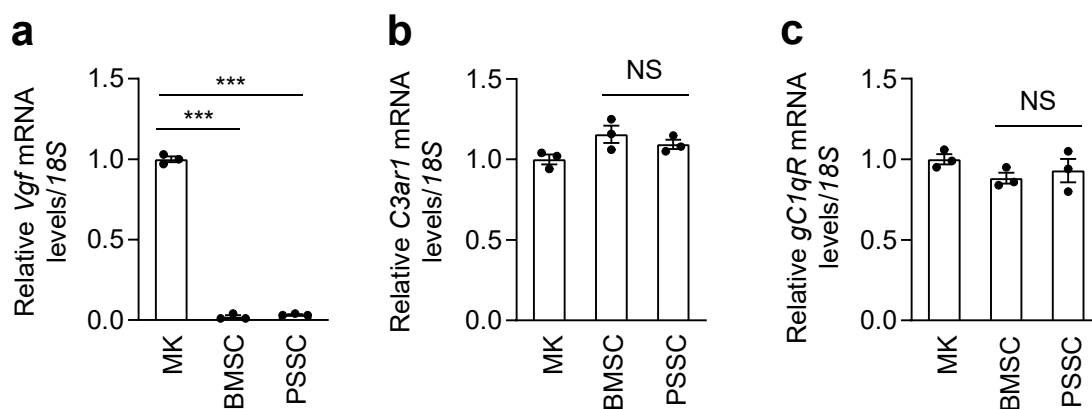

**Supplementary Fig. 6. Expressions of *Vgf* and its receptors in MK and skeletal stem cells from periosteum and bone marrow. a-c,** Bone marrow skeletal stem cells (BMSC), periosteal skeletal stem cells (PSSC), and megakaryocytes (MK) were isolated from mice . Relative expression of mRNA was determined by real-time PCR. Data represent mean  $\pm$  SEM ( $n = 3$ ). \*\*\* $p < 0.001$  between the groups. NS, not significant.

## Supplementary Figure 7

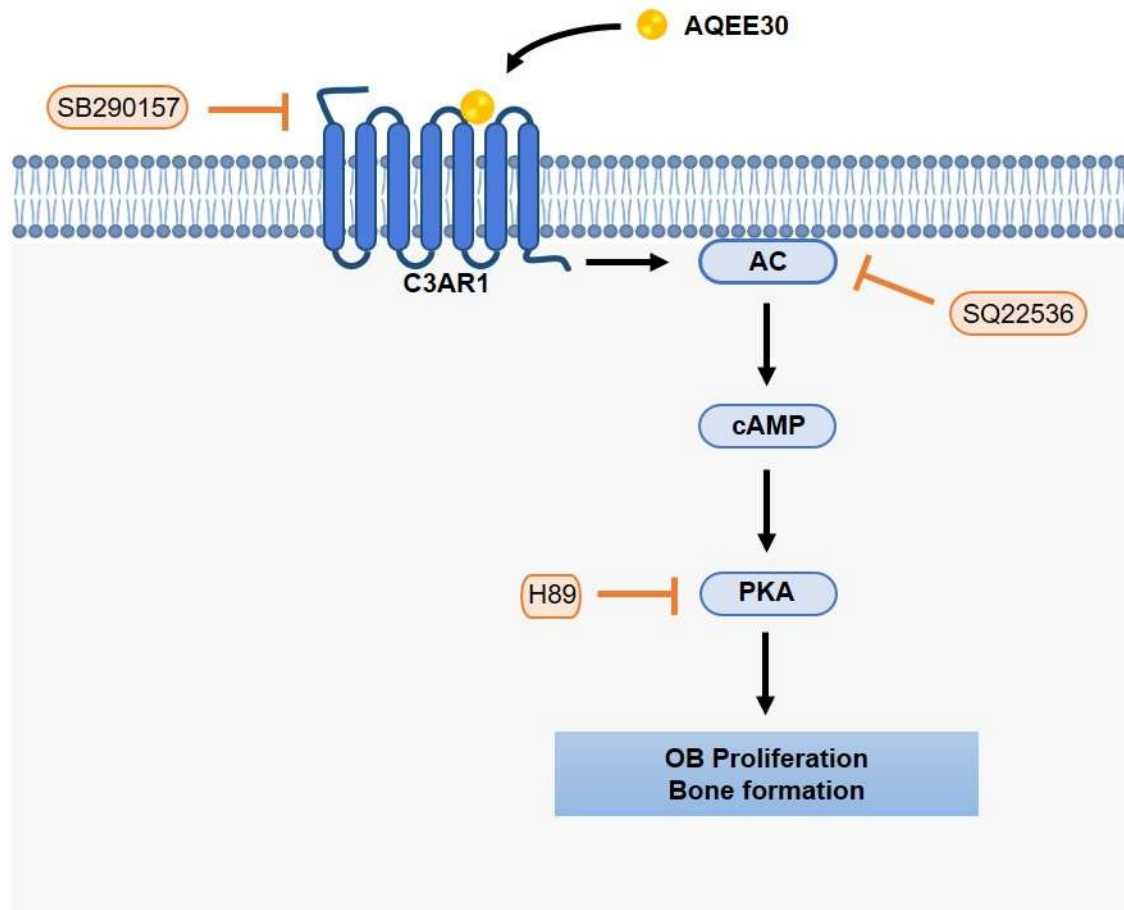

**Supplementary Fig. 7. A proposed model of AQEE30's roles on osteoblastic proliferation and bone formation.** AQEE30 activates the C3AR1 and consequently triggers the AC-cAMP-PKA signalling pathway, which in turn promotes osteoblastic proliferation and bone formation. C3AR1, complement C3a receptor-1; AC, adenylyl cyclase; cAMP, cyclic adenosine monophosphate; OB, osteoblast; PKA, protein kinase A.
